# Supplementary material for: A serum microRNA classifier for the diagnosis of sarcomas of various histological subtypes
Source: PubMed Central journal article supplement (PMC6428849; doi:10.1038/s41467-019-09143-8), 2019-03-21
Supplement: 41467_2019_9143_MOESM2_ESM.pdf [file 41467_2019_9143_MOESM2_ESM.pdf]

## **Supplementary Information**

**A serum microRNA classifier for the diagnosis of sarcomas of various  
histological subtypes**

**Asano and Matsuzaki et al.**

## **Supplementary Information**

**Supplementary Figure 1.** Serum miRNA profiles in patients with bone and soft tissue tumors

**Supplementary Figure 2.** Cluster analysis of 83 identified serum miRNAs in the training cohort

**Supplementary Figure 3.** Quantitative RT-PCR as orthogonal validation

**Supplementary Figure 4.** Index VI values according to TNM stage parameters

**Supplementary Figure 5.** The utility of Index VI as a sarcoma biomarker

**Supplementary Figure 6.** Correlation between miRNA levels in serum and tissue samples

**Supplementary Table 1.** Histological diagnosis of participants in the discovery, training, and validation sets

**Supplementary Table 2.** Histological diagnosis of participants in the exploratory set

**Supplementary Table 3.** Differences in characteristics between the malignant, benign, healthy, and intermediate groups

**Supplementary Table 4.** Serum expression levels of selected miRNAs in the discovery set

**Supplementary Table 5.** Odds ratios for discriminating sarcoma

**Supplementary Table 6.** Information on the miScript PCR primers

**Supplementary Methods**

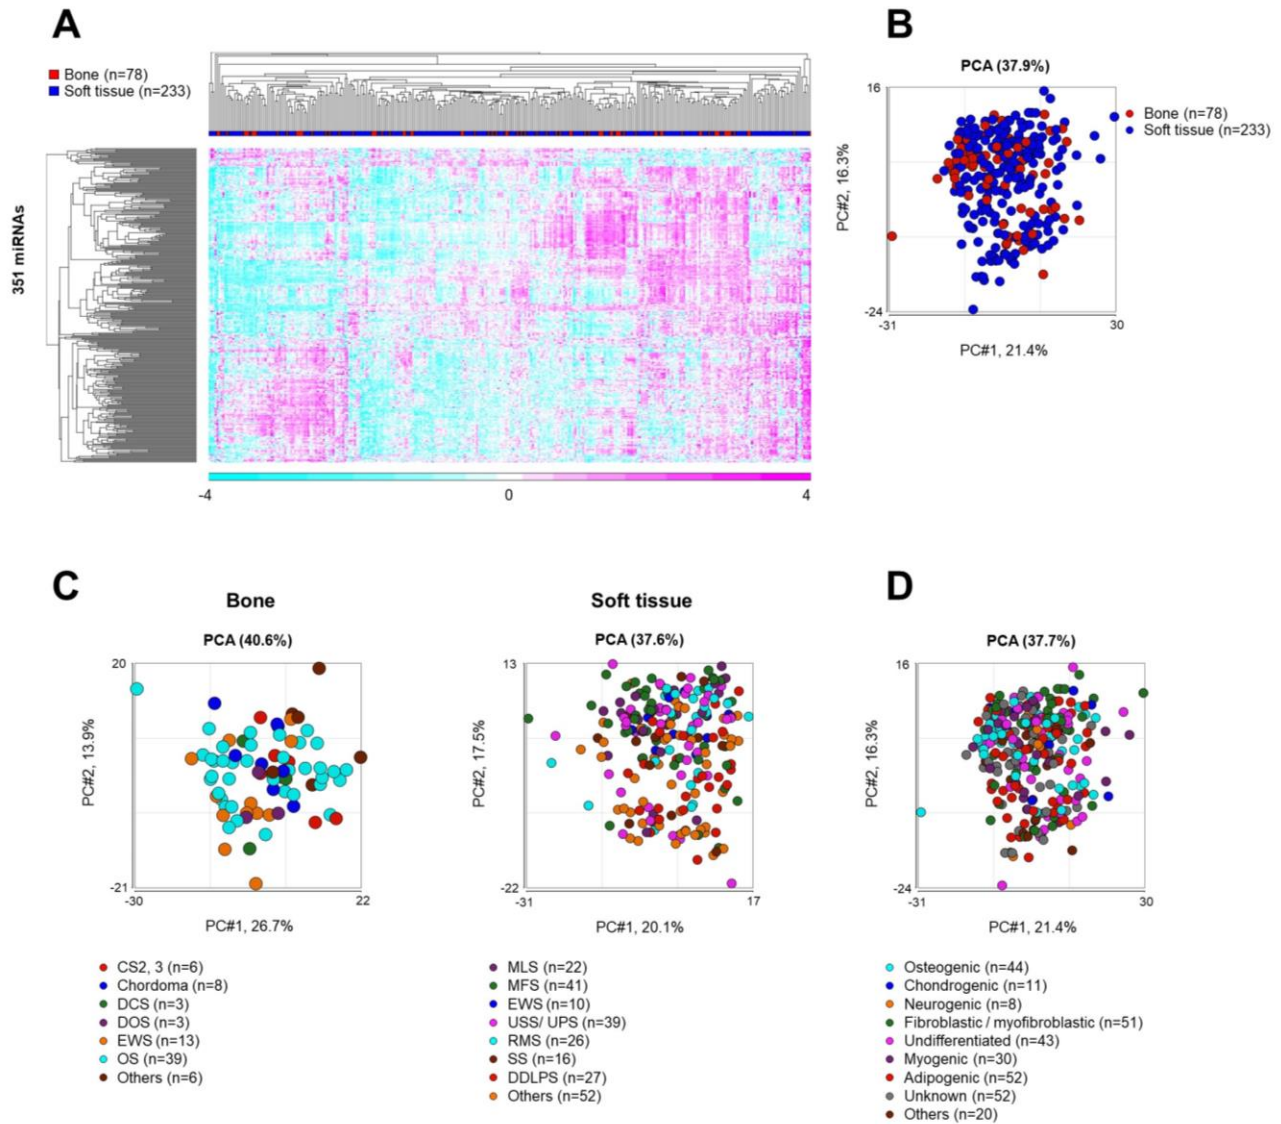

### Supplementary Figure 1: Serum miRNA profiles in patients with bone and soft tissue tumors

Serum miRNA profiles were compared between bone tissue and soft tissue tumors by (A) unsupervised cluster analysis and (B) PCA; and among (C) histological subtypes and (E) tumor differentiation lineage by PCA. CS2,3, chondrosarcoma, grades II and III; DOS, differentiated osteosarcoma; DCS, differentiated chondrosarcoma; EWS, Ewing sarcoma; OS, osteosarcoma; MLS, myxoid liposarcoma; MFS, myxofibrosarcoma; USS/UPS, undifferentiated spindle cell sarcoma/undifferentiated pleomorphic sarcoma; RMS, rhabdomyosarcoma; SS, synovial sarcoma; DDLPS, dedifferentiated liposarcoma.

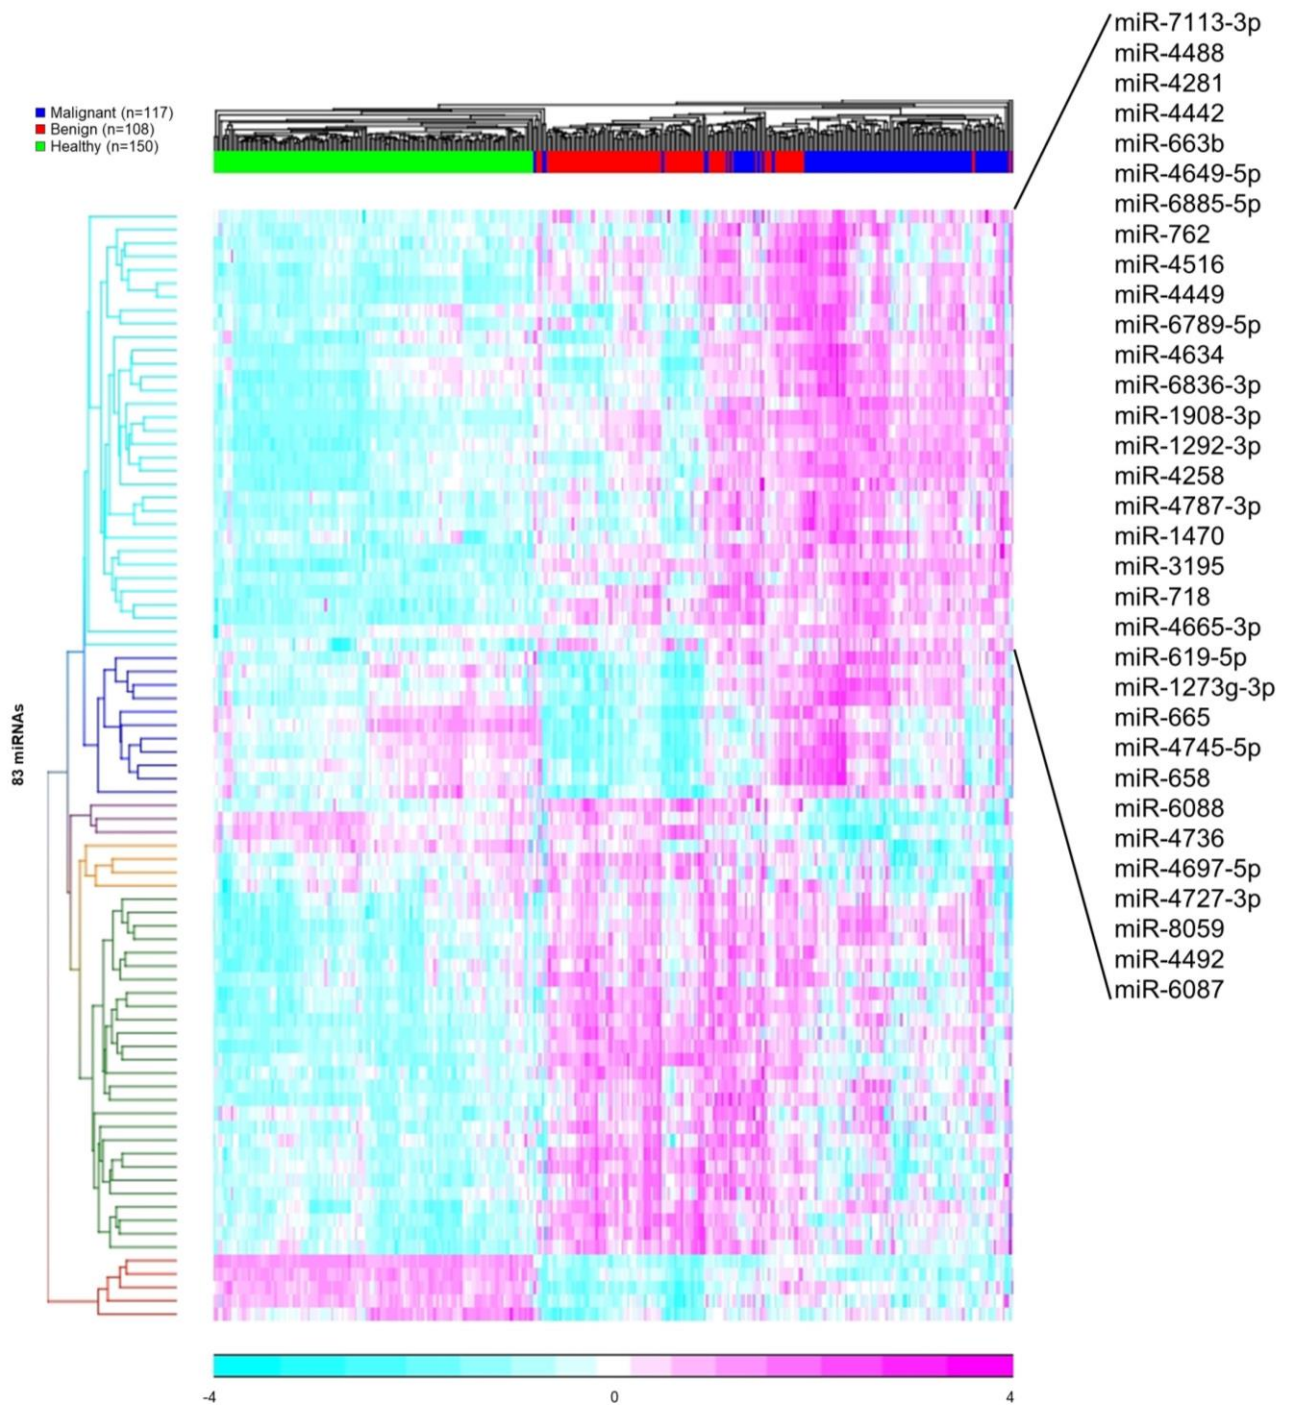

**Supplementary Figure 2: Cluster analysis of 83 identified serum miRNAs in the training cohort**

83 miRNAs were divided into six clusters. One cluster (shown in sky blue), in which expression was increased through healthy, benign, and malignant groups in a step-by-step manner, included 33 miRNAs. These miRNAs were considered to be biomarker candidates.

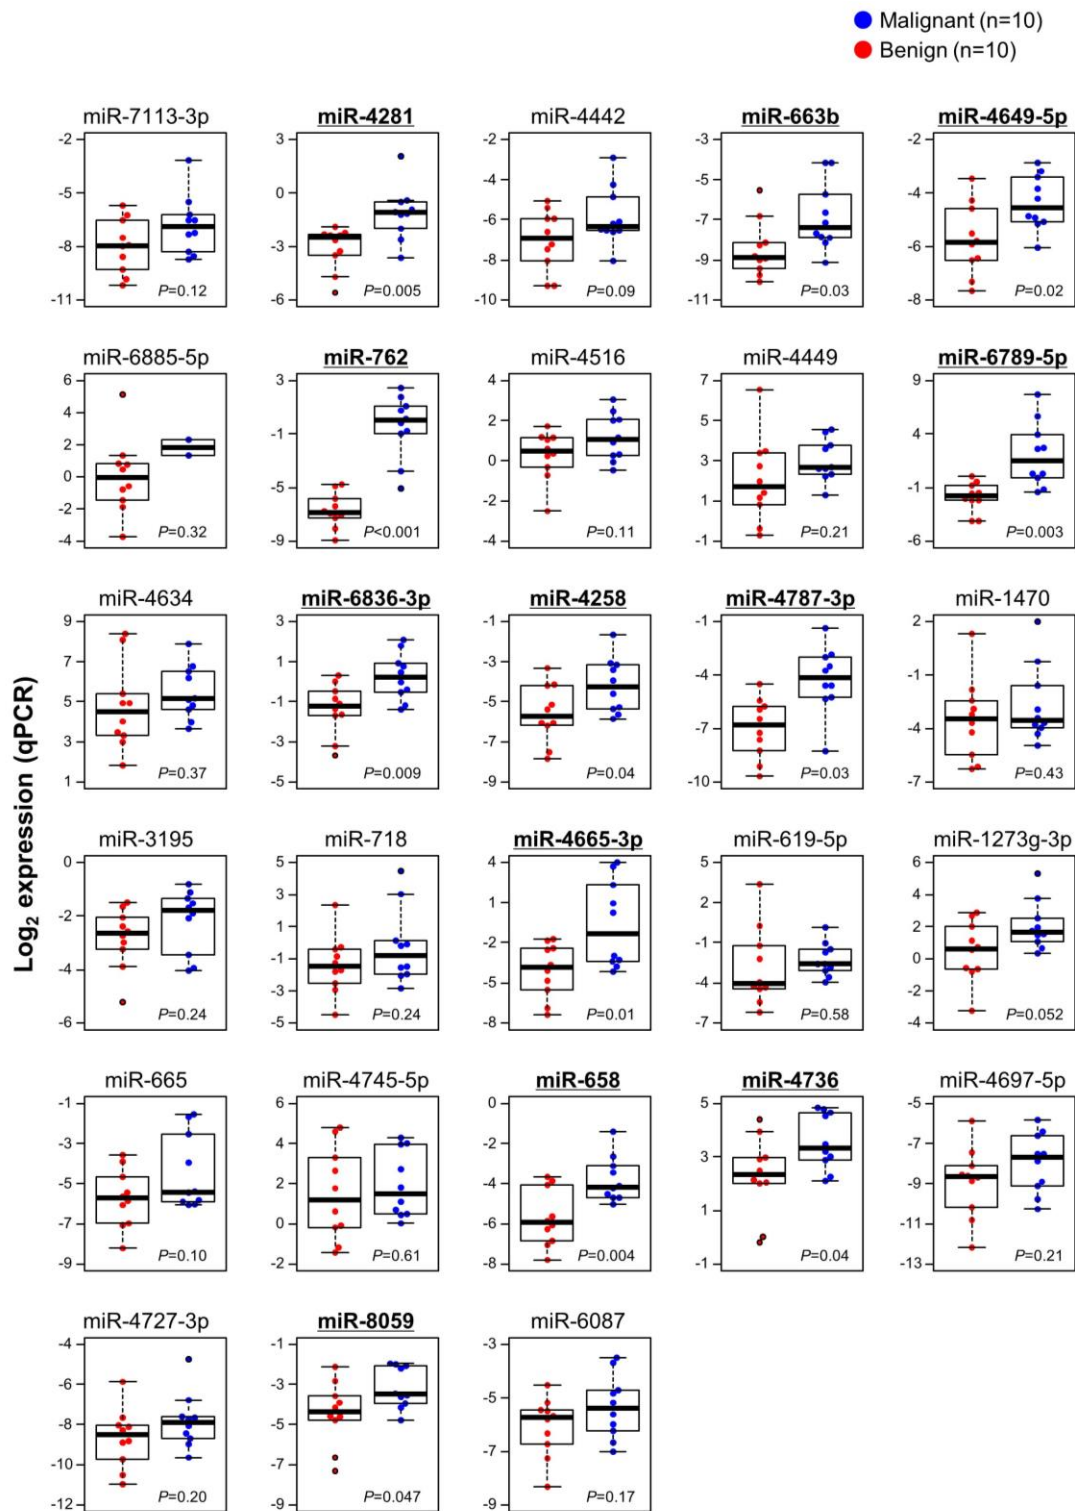

### Supplementary Figure 3: Quantitative RT-PCR as orthogonal validation

Serum levels of each miRNA were quantified by qRT-PCR in 10 malignant and 10 benign bone and soft tissue tumor samples. *P* values were calculated by Student's *t*-test. Twelve miRNAs (underlined) that were upregulated in the malignant group ( $P < 0.05$ ) were included in further analyses. Box and whisker plots represent the median, 25th and 75th percentiles, and range of the data.

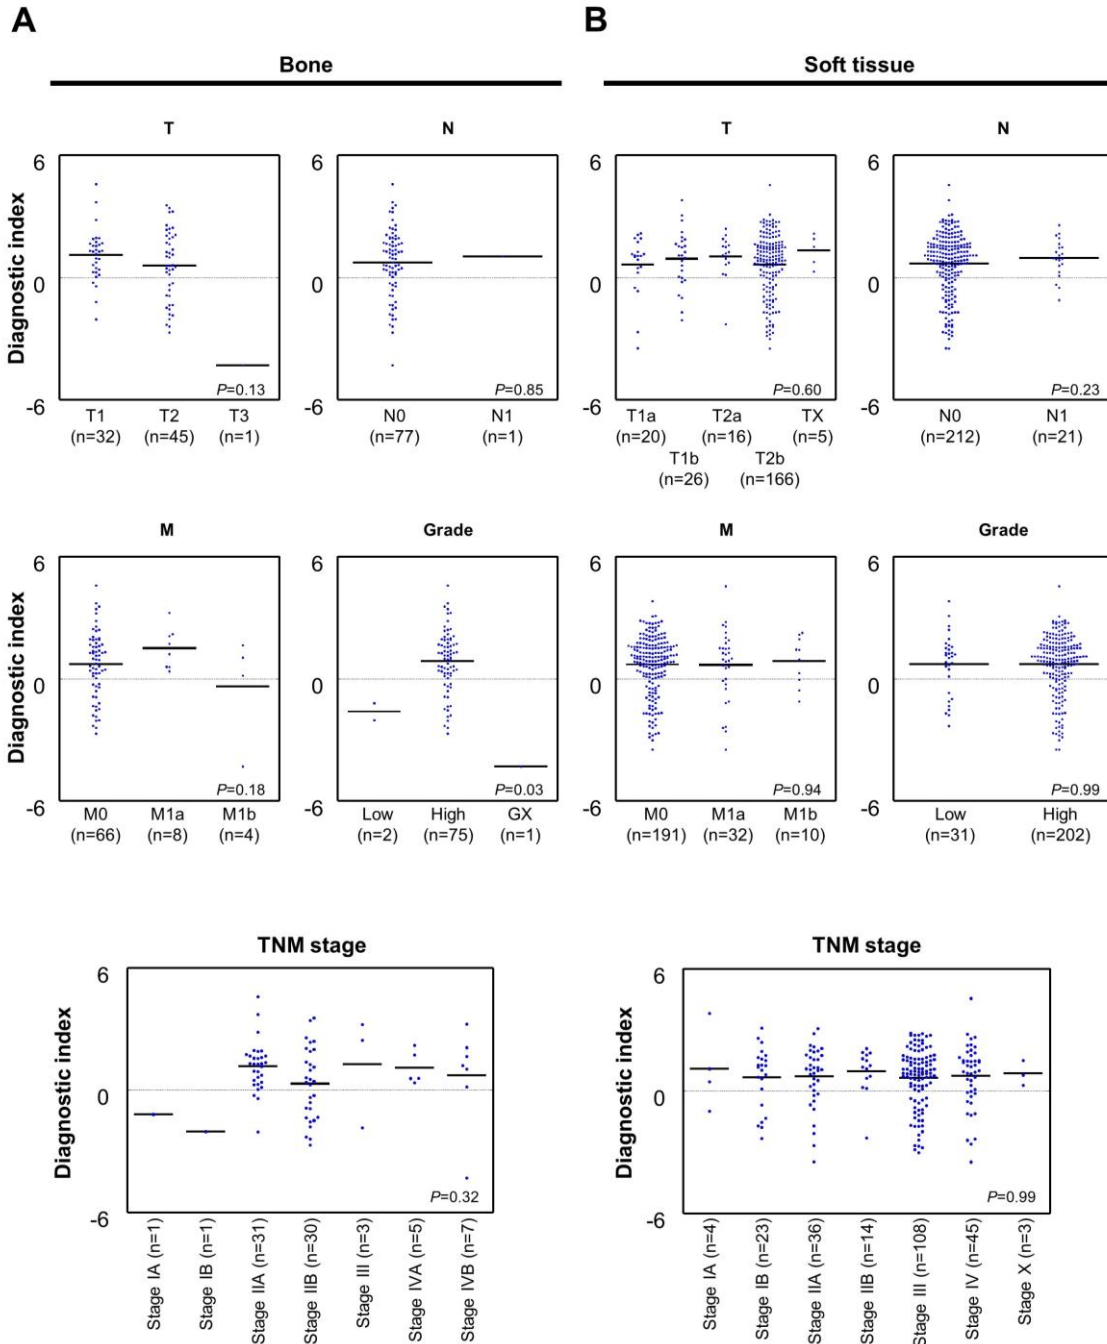

### Supplementary Figure 4: Index VI values according to TNM stage parameters

The values of Index VI were compared according to primary tumor size and depth (T), regional lymph node metastasis at present (N), distant metastasis at present (M), histological grade (Grade), and TNM stage in bone sarcomas (A) and soft tissue sarcomas (B) in the discovery, training, and validation sets. In bone sarcomas: T1,  $\leq 8$  cm; T2,  $> 8$  cm; T3, discontinuous tumors; N0, no regional lymph node metastasis; N1, regional lymph node metastasis; M0, no distant metastasis; M1, distant metastasis. In soft tissue sarcomas: T1a,  $\leq 5$  cm and superficial tumor; T1b,  $\leq 5$  cm and deep tumor; T2a,  $> 5$  cm and superficial tumor; T2b,  $> 5$  cm and deep tumors; TX, primary tumor cannot be assessed.

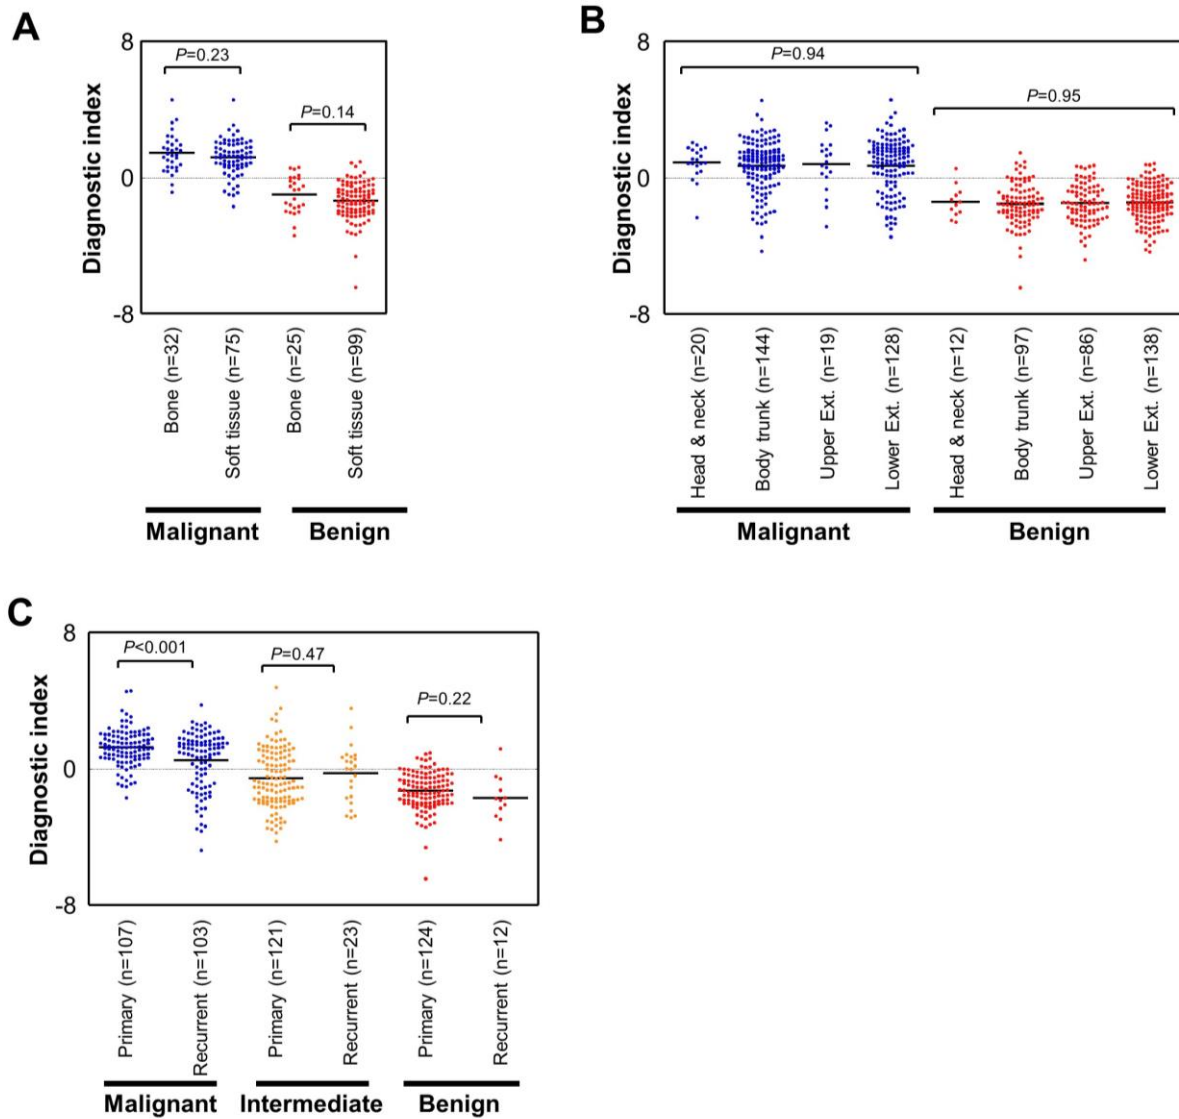

### Supplementary Figure 5: The utility of Index VI as a sarcoma biomarker

The values of Index VI were compared according to (A) tumor tissue origin and (B) tumor site in the validation set, and (C) initial tumor status (primary vs. recurrent) in the validation and exploratory sets.

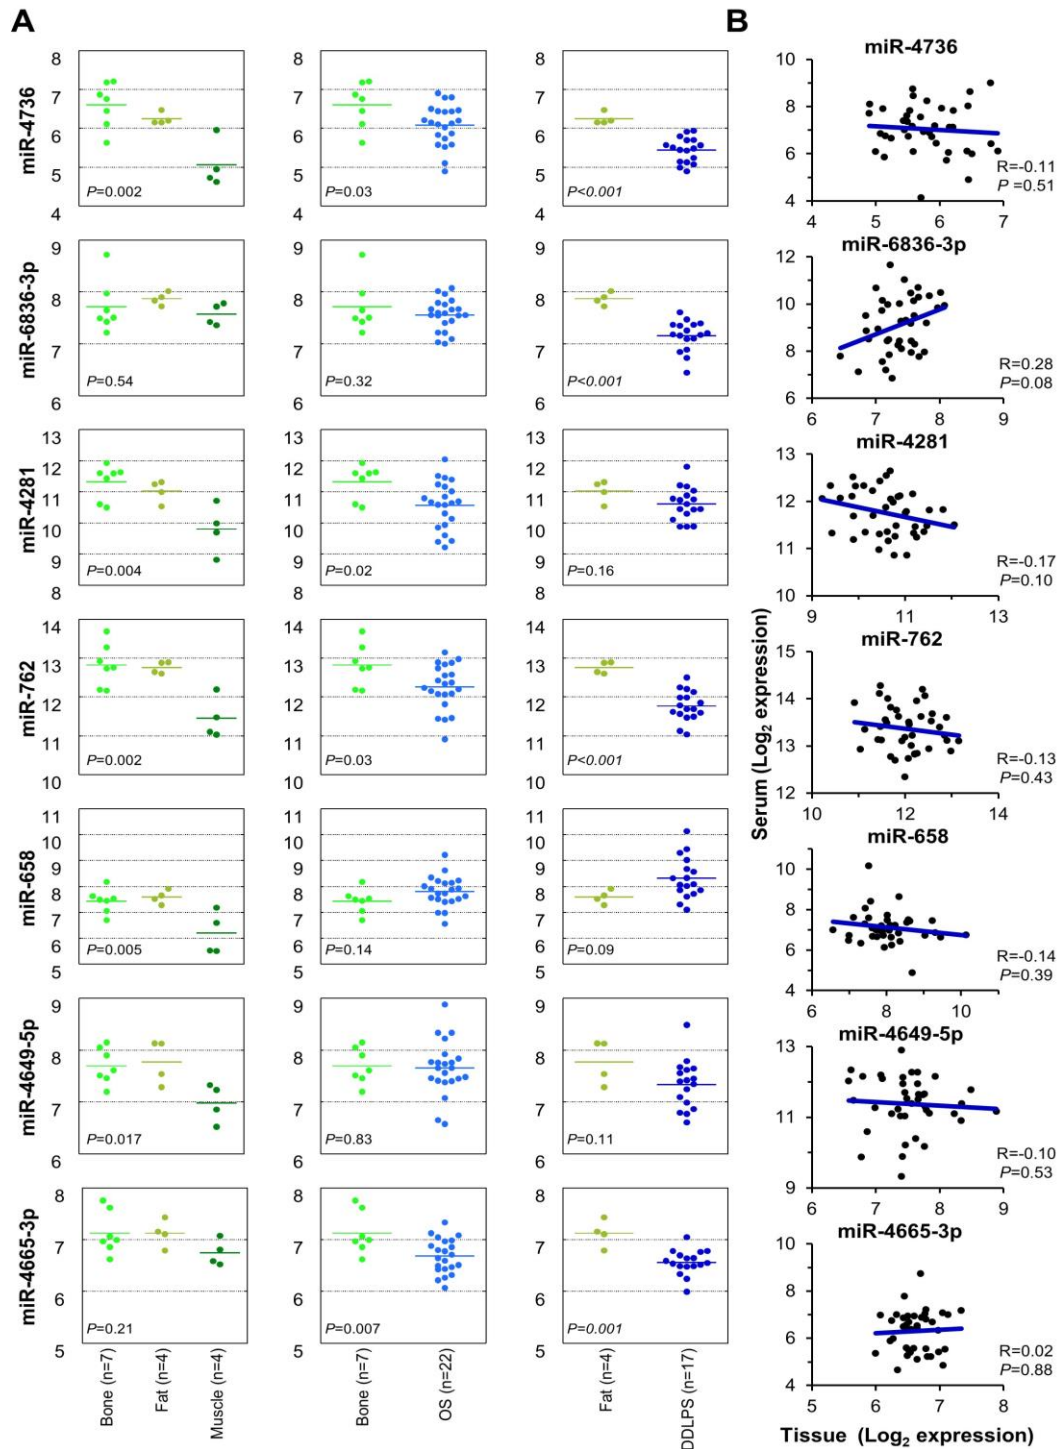

### Supplementary Figure 6: Correlation between miRNA levels in serum and tissue samples

(A) Expression levels of the seven miRNAs included in Index VI, as determined by microarray analysis in normal bone (n=7), fat (n=4), muscle (n=4), and tumor tissues (22 osteosarcomas and 18 dedifferentiated liposarcomas). (B) Correlation analyses of the expression levels of the seven miRNAs included in Index VI, comparing serum vs. tissue samples in 40 patients with sarcoma (22 osteosarcomas and 18 dedifferentiated liposarcomas). R = Spearman's correlation coefficient.



**Supplementary Table 1: Histological diagnosis of participants in the discovery, training, and validation sets**

|                                 | Discovery set          | Training set      | Training set 2   | Validation set | P value <sup>a</sup> |       |
|---------------------------------|------------------------|-------------------|------------------|----------------|----------------------|-------|
| <b><i>Malignant</i></b>         |                        |                   |                  |                |                      |       |
| Bone                            | n=20                   | n=23              | n=3              | n=32           | 0.83                 |       |
| Dedifferentiated osteosarcoma   | 0 (0%)                 | 1 (4.3%)          | 0 (0%)           | 2 (6.3%)       |                      |       |
| Dedifferentiated chondrosarcoma | 0 (0%)                 | 1 (4.3%)          | 0 (0%)           | 2 (6.3%)       |                      |       |
| Chondrosarcoma, grades II, III  | 1 (5.0%)               | 3 (13.0%)         | 0 (0%)           | 2 (6.3%)       |                      |       |
| Ewing sarcoma                   | 2 (10.0%)              | 4 (17.4%)         | 1 (20.0%)        | 6 (18.8%)      |                      |       |
| Osteosarcoma                    | 11 (55.0%)             | 12 (52.2%)        | 2 (45.7%)        | 14 (43.8%)     |                      |       |
| Chordoma                        | 2 (10.0%)              | 2 (8.7%)          | 0 (0%)           | 4 (12.5%)      |                      |       |
| Others                          | 4 (20.0%) <sup>b</sup> | 0 (0%)            | 0 (0%)           | 2 (6.3%)       |                      |       |
| Soft tissue                     | n=57                   | n=94              | n=7              | n=75           |                      | 0.012 |
| Ewing sarcoma                   | 0 (0%)                 | 7 (7.4%)          | 0 (0%)           | 3 (4.0%)       |                      |       |
| Myxofibrosarcoma                | 4 (7.0%)               | <b>24 (25.5%)</b> | 1 (14.3%)        | 12 (16.0%)     |                      |       |
| USS/UPS                         | 9 (15.8%)              | 13 (13.8%)        | <b>4 (57.1%)</b> | 13 (17.3%)     |                      |       |
| Myxoid liposarcoma              | 3 (5.3%)               | 9 (9.6%)          | 1 (14.3%)        | 9 (12.0%)      |                      |       |
| Synovial sarcoma                | 8 (14.0%)              | 5 (5.3%)          | 0 (0%)           | 3 (4.0%)       |                      |       |
| Rhabdomyosarcoma                | 7 (12.3%)              | 10 (10.6%)        | 1 (14.3%)        | 8 (10.7%)      |                      |       |
| Dedifferentiated liposarcoma    | 5 (8.8%)               | 10 (10.6%)        | 0 (0%)           | 12 (16.0%)     |                      |       |
| Others                          | <b>21 (36.8%)</b>      | 16 (17.0%)        | 0 (0%)           | 15 (20.0%)     |                      |       |
| <b><i>Benign</i></b>            |                        |                   |                  |                |                      |       |
| Bone                            | n=15                   | n=23              | n=6              | n=25           | 0.95                 |       |
| Inflammation                    | 2 (13.3%)              | 2 (8.7%)          | 1 (16.7%)        | 1 (4.0%)       |                      |       |
| Fibrous dysplasia               | 3 (20.0%)              | 3 (13.0%)         | 1 (16.7%)        | 2 (8.0%)       |                      |       |
| Osteoid osteoma                 | 1 (6.7%)               | 1 (4.3%)          | 1 (16.7%)        | 2 (8.0%)       |                      |       |
| Enchondroma                     | 1 (6.7%)               | 5 (21.7%)         | 1 (16.7%)        | 4 (16.0%)      |                      |       |
| Osteochondroma                  | 4 (26.7%)              | 5 (21.7%)         | 1 (16.7%)        | 5 (20.0%)      |                      |       |
| Simple bone cyst                | 1 (6.7%)               | 1 (4.3%)          | 0 (0%)           | 5 (20.0%)      |                      |       |
| Others                          | 3 (20.0%)              | 6 (26.1%)         | 1 (16.7%)        | 6 (24.0%)      |                      |       |
| Soft tissue                     | n=69                   | n=86              | n=4              | n=99           | 0.24                 |       |
| Neurofibromatosis               | 4 (5.8%)               | 4 (4.7%)          | 0 (0%)           | 1 (1.0%)       |                      |       |
| Schwannoma                      | 9 (13.0%)              | 19 (22.1%)        | 1 (25.0%)        | 19 (19.2%)     |                      |       |
| Lipoma                          | 24 (34.8%)             | 22 (25.6%)        | 0 (0%)           | 39 (39.4%)     |                      |       |
| Tenosynovial giant cell tumor   | 4 (5.8%)               | 10 (11.6%)        | 1 (25.0%)        | 7 (7.1%)       |                      |       |
| Fibroma                         | 1 (1.4%)               | 3 (3.5%)          | 1 (25.0%)        | 2 (2.0%)       |                      |       |
| Hemangioma                      | 5 (7.2%)               | 7 (8.1%)          | 0 (0%)           | 7 (7.1%)       |                      |       |
| Others                          | 22 (31.9%)             | 21 (24.4%)        | 1 (25.0%)        | 24 (24.2%)     |                      |       |

<sup>a</sup> Pearson's  $\chi^2$  test and residual analysis.

Bold values indicate significant differences between groups (adjusted standardized residuals >2.58 or <-2.58, which represent p <0.01).

USS/UPS, undifferentiated spindle cell sarcoma/undifferentiated pleomorphic sarcoma.

**Supplementary Table 2: Histological diagnosis of participants in the exploratory set**

|                                                           | Primary    | Recurrent  |
|-----------------------------------------------------------|------------|------------|
| <b><u>Malignant</u></b>                                   |            |            |
| Bone                                                      |            | n=5        |
| Ewing sarcoma                                             |            | 1 (20.0%)  |
| Osteosarcoma                                              |            | 4 (80.0%)  |
| Soft tissue                                               |            | n=98       |
| Myxoid liposarcoma                                        |            | 9 (9.2%)   |
| Myxofibrosarcoma                                          | -          | 6 (6.1%)   |
| Ewing sarcoma                                             |            | 2 (2.0%)   |
| USS/UPS                                                   |            | 13 (13.3%) |
| Rhabdomyosarcoma                                          |            | 3 (3.1%)   |
| Synovial sarcoma                                          |            | 6 (6.1%)   |
| Dedifferentiated liposarcoma                              |            | 21 (21.4%) |
| Others                                                    |            | 38 (38.8%) |
| <b><u>Intermediate</u></b>                                |            |            |
| Bone                                                      | n=48       | n=8        |
| Atypical cartilaginous tumor/chondrosarcoma, grade I      | 7 (14.6%)  | 2 (25.0%)  |
| Aneurysmal bone cyst                                      | 7 (14.6%)  | 1 (12.5%)  |
| Giant cell tumor of bone                                  | 23 (47.9%) | 5 (62.5%)  |
| Osteoblastoma                                             | 3 (6.3%)   | 0 (0%)     |
| Chondroblastoma                                           | 3 (6.3%)   | 0 (0%)     |
| Langerhans cell histiocytosis                             | 4 (8.3%)   | 0 (0%)     |
| Others                                                    | 1 (2.1%)   | 0 (0%)     |
| Soft tissue                                               | n=73       | n=15       |
| Atypical lipomatous tumor/well-differentiated liposarcoma | 38 (52.1%) | 13 (86.7%) |
| Dermatofibrosarcoma protuberans                           | 9 (12.3%)  | 0 (0%)     |
| Myoepithelioma                                            | 2 (2.7%)   | 0 (0%)     |
| Desmoid-type fibromatosis                                 | 15 (20.5%) | 2 (13.3%)  |
| Palmar/plantar fibromatosis                               | 2 (2.7%)   | 0 (0%)     |
| Solitary fibrous tumor                                    | 4 (5.5%)   | 0 (0%)     |
| Others                                                    | 3 (4.2%)   | 0 (0%)     |
| <b><u>Benign</u></b>                                      |            |            |
| Bone                                                      |            | n=5        |
| Inflammation                                              |            | 1 (20.0%)  |
| Fibrous dysplasia                                         |            | 1 (20.0%)  |
| Simple bone cyst                                          |            | 1 (20.0%)  |
| Others                                                    |            | 2 (40.0%)  |
| Soft tissue                                               |            | n=7        |
| Lipoma                                                    |            | 2 (28.6%)  |
| Schwannoma                                                |            | 1 (14.3%)  |
| Tenosynovial giant cell tumor                             |            | 2 (28.6%)  |
| Others                                                    |            | 2 (28.6%)  |

USS/UPS, undifferentiated spindle cell sarcoma/undifferentiated pleomorphic sarcoma.

**Supplementary Table 3: Differences in characteristics between the malignant, benign, healthy, and intermediate groups**

|                                       | Malignant         | Benign             | Healthy            | Intermediate | P value            |
|---------------------------------------|-------------------|--------------------|--------------------|--------------|--------------------|
| <b><u>Discovery set</u></b>           |                   |                    |                    |              |                    |
|                                       | n=77              | n=84               |                    |              |                    |
| Age (y)                               | 45.9 ± 23.6       | 44.8 ± 18.4        |                    |              | 0.76 <sup>a</sup>  |
| Sex                                   |                   |                    |                    |              |                    |
| Men                                   | 46 (59.7%)        | 42 (50.0%)         | -                  | -            | 0.22 <sup>b</sup>  |
| Women                                 | 31 (40.3%)        | 42 (50.0%)         |                    |              |                    |
| <b><u>Training set</u></b>            |                   |                    |                    |              |                    |
|                                       | n=117             | n=109              | n=150              |              |                    |
| Age (y)                               | 50.1 ± 21.7       | <b>43.8 ± 18.4</b> | 51.2 ± 12.2        |              | 0.002 <sup>c</sup> |
| Sex                                   |                   |                    |                    |              |                    |
| Men                                   | 70 (59.8%)        | 58 (53.2%)         | 82 (54.7%)         | -            | 0.56 <sup>b</sup>  |
| Women                                 | 47 (40.2%)        | 51 (46.8%)         | 68 (45.3%)         |              |                    |
| <b><u>Training set 2</u></b>          |                   |                    |                    |              |                    |
|                                       | n=10              | n=10               |                    |              |                    |
| Age (y)                               | 47.7 ± 29.7       | 41.0 ± 22.9        |                    |              | 0.58 <sup>a</sup>  |
| Sex                                   |                   |                    |                    |              |                    |
| Men                                   | 4 (40.0%)         | 6 (60.0%)          | -                  | -            | 0.37 <sup>b</sup>  |
| Women                                 | 6 (60.0%)         | 4 (40.0%)          |                    |              |                    |
| <b><u>Validation</u></b>              |                   |                    |                    |              |                    |
|                                       | n=107             | n=124              | n=125              |              |                    |
| Age (y)                               | 43.8 ± 22.9       | 44.5 ± 19.1        | <b>51.1 ± 12.1</b> |              | 0.003 <sup>c</sup> |
| Sex                                   |                   |                    |                    |              |                    |
| Men                                   | <b>69 (64.5%)</b> | <b>52 (41.9%)</b>  | 68 (54.4%)         | -            | 0.003 <sup>b</sup> |
| Women                                 | <b>38 (35.5%)</b> | <b>72 (58.1%)</b>  | 57 (45.6%)         |              |                    |
| <b><u>Exploratory (Primary)</u></b>   |                   |                    |                    |              |                    |
|                                       |                   |                    |                    | n=121        |                    |
| Age (y)                               |                   |                    |                    | 43.0 ± 19.4  |                    |
| Sex                                   |                   |                    |                    | 70 (57.9%)   |                    |
| Men                                   | -                 | -                  | -                  | 51 (42.1%)   | -                  |
| Women                                 |                   |                    |                    |              |                    |
| <b><u>Exploratory (Recurrent)</u></b> |                   |                    |                    |              |                    |
|                                       | n=103             | n=12               |                    | n=23         |                    |
| Age (y)                               | 51.3 ± 17.9       | 40.2 ± 17.6        |                    | 54.1 ± 17.0  | 0.08 <sup>c</sup>  |
| Sex                                   |                   |                    |                    |              |                    |
| Men                                   | 60 (58.3%)        | 7 (58.3%)          | -                  | 11 (47.8%)   | 0.65 <sup>b</sup>  |
| Women                                 | 43 (41.7%)        | 5 (41.7%)          |                    | 12 (52.2%)   |                    |

<sup>a</sup> Student's *t*-test, <sup>b</sup> Pearson's  $\chi^2$  test and residual analysis, <sup>c</sup> One-way ANOVA (analysis of variance) and Tukey's post-hoc analysis.

Bold values indicate significant differences between groups (adjusted standardized residuals >2.58 or <-2.58, which represent  $p < 0.01$ ).

**Supplementary Table 4: Serum expression levels of selected miRNAs in the discovery set**

|              | Malignant<br>(n=77) | Benign<br>(n=84) | Cross-validation<br>score <sup>a</sup> | Fold change |
|--------------|---------------------|------------------|----------------------------------------|-------------|
| miR-1237-5p  | 12.6 ± 0.4          | 12.2 ± 0.3       | 0.68                                   | 1.3         |
| miR-6787-5p  | 8.8 ± 0.6           | 9.2 ± 0.5        | 0.68                                   | 1.3         |
| miR-1915-3p  | 10.4 ± 0.6          | 9.9 ± 0.4        | 0.68                                   | 1.4         |
| miR-4730     | 7.5 ± 0.9           | 6.9 ± 0.9        | 0.68                                   | 1.5         |
| miR-6794-5p  | 8.2 ± 0.6           | 8.5 ± 0.4        | 0.68                                   | 1.3         |
| miR-6741-5p  | 7.7 ± 0.6           | 8.0 ± 0.4        | 0.67                                   | 1.3         |
| miR-6869-5p  | 12.8 ± 0.8          | 12.4 ± 0.6       | 0.67                                   | 1.4         |
| miR-6782-5p  | 5.9 ± 0.9           | 6.5 ± 0.6        | 0.66                                   | 1.5         |
| miR-3178     | 11.5 ± 0.6          | 11.2 ± 0.4       | 0.66                                   | 1.3         |
| miR-6893-5p  | 7.6 ± 0.6           | 8.0 ± 0.6        | 0.66                                   | 1.3         |
| miR-718      | 7.2 ± 0.8           | 6.5 ± 0.7        | 0.66                                   | 1.6         |
| miR-1908-3p  | 6.9 ± 0.9           | 6.3 ± 0.7        | 0.65                                   | 1.5         |
| miR-4454     | 10.4 ± 1.0          | 10.8 ± 0.8       | 0.65                                   | 1.4         |
| miR-6717-5p  | 6.7 ± 1.3           | 7.4 ± 0.9        | 0.65                                   | 1.7         |
| miR-7975     | 8.4 ± 1.1           | 8.9 ± 0.8        | 0.65                                   | 1.4         |
| miR-937-5p   | 8.0 ± 0.5           | 8.3 ± 0.4        | 0.65                                   | 1.2         |
| miR-328-5p   | 11.6 ± 0.3          | 11.8 ± 0.3       | 0.64                                   | 1.1         |
| miR-4634     | 8.8 ± 0.8           | 8.2 ± 0.5        | 0.64                                   | 1.5         |
| miR-4763-3p  | 9.5 ± 0.3           | 9.7 ± 0.4        | 0.64                                   | 1.1         |
| miR-6756-5p  | 8.9 ± 0.4           | 9.2 ± 0.3        | 0.64                                   | 1.2         |
| miR-6861-5p  | 7.8 ± 0.5           | 8.1 ± 0.5        | 0.64                                   | 1.3         |
| miR-1273g-3p | 8.4 ± 1.0           | 7.9 ± 0.8        | 0.63                                   | 1.4         |
| miR-128-1-5p | 6.3 ± 0.6           | 6.0 ± 0.7        | 0.63                                   | 1.2         |
| miR-365a-5p  | 6.9 ± 0.8           | 7.4 ± 0.6        | 0.63                                   | 1.4         |
| miR-4649-5p  | 11.4 ± 0.8          | 11.1 ± 0.7       | 0.63                                   | 1.2         |
| miR-663b     | 8.9 ± 0.8           | 8.6 ± 0.8        | 0.63                                   | 1.2         |
| miR-665      | 7.5 ± 0.7           | 7.0 ± 0.7        | 0.63                                   | 1.5         |
| miR-6766-5p  | 6.3 ± 0.8           | 6.6 ± 0.8        | 0.63                                   | 1.3         |
| miR-6819-5p  | 8.0 ± 0.4           | 8.2 ± 0.4        | 0.63                                   | 1.2         |
| miR-6836-3p  | 8.4 ± 1.1           | 7.8 ± 0.7        | 0.63                                   | 1.5         |
| miR-6885-5p  | 11.8 ± 0.8          | 11.4 ± 0.7       | 0.63                                   | 1.3         |
| miR-1246     | 7.4 ± 2.0           | 8.1 ± 1.6        | 0.63                                   | 1.7         |
| miR-1470     | 6.3 ± 0.9           | 5.9 ± 0.9        | 0.63                                   | 1.3         |
| miR-4442     | 9.5 ± 0.4           | 9.4 ± 0.3        | 0.63                                   | 1.1         |

|              |            |            |      |     |
|--------------|------------|------------|------|-----|
| miR-4488     | 13.6 ± 0.4 | 13.3 ± 0.3 | 0.63 | 1.2 |
| miR-6088     | 12 ± 0.4   | 11.8 ± 0.4 | 0.63 | 1.2 |
| miR-619-5p   | 7.8 ± 1.4  | 7.2 ± 1.3  | 0.63 | 1.5 |
| miR-6789-5p  | 9.9 ± 0.6  | 9.7 ± 0.4  | 0.63 | 1.2 |
| miR-6829-5p  | 6.7 ± 0.7  | 6.9 ± 0.6  | 0.63 | 1.2 |
| miR-762      | 12.9 ± 0.7 | 12.7 ± 0.5 | 0.63 | 1.2 |
| miR-8059     | 9.8 ± 1.2  | 10.4 ± 1.0 | 0.63 | 1.6 |
| miR-1909-3p  | 8.5 ± 0.4  | 8.3 ± 0.3  | 0.62 | 1.2 |
| miR-4286     | 6.5 ± 0.9  | 6.9 ± 0.6  | 0.62 | 1.3 |
| miR-4492     | 10.4 ± 0.6 | 10.2 ± 0.4 | 0.62 | 1.2 |
| miR-4516     | 13.3 ± 0.8 | 13.1 ± 0.7 | 0.62 | 1.2 |
| miR-4674     | 9.7 ± 0.9  | 9.1 ± 0.8  | 0.62 | 1.5 |
| miR-6087     | 12.6 ± 0.3 | 12.5 ± 0.4 | 0.62 | 1.1 |
| miR-6768-5p  | 9.8 ± 0.6  | 9.4 ± 0.5  | 0.62 | 1.3 |
| miR-6784-5p  | 11.6 ± 0.4 | 11.4 ± 0.5 | 0.62 | 1.2 |
| miR-92a-3p   | 6.3 ± 1.1  | 6.8 ± 0.9  | 0.62 | 1.4 |
| miR-1193     | 6.3 ± 0.8  | 6.7 ± 0.7  | 0.61 | 1.3 |
| miR-1247-3p  | 6.8 ± 0.7  | 7.1 ± 0.6  | 0.61 | 1.3 |
| miR-1260b    | 9.0 ± 0.8  | 9.3 ± 0.6  | 0.61 | 1.2 |
| miR-3195     | 8.0 ± 0.9  | 7.4 ± 0.6  | 0.61 | 1.5 |
| miR-3196     | 12.1 ± 0.4 | 11.8 ± 0.3 | 0.61 | 1.2 |
| miR-4258     | 10.0 ± 0.8 | 9.5 ± 0.6  | 0.61 | 1.4 |
| miR-4449     | 6.7 ± 0.9  | 6.2 ± 0.6  | 0.61 | 1.4 |
| miR-4697-5p  | 8.5 ± 0.5  | 8.4 ± 0.4  | 0.61 | 1.1 |
| miR-4727-3p  | 5.6 ± 1.1  | 6.0 ± 1.0  | 0.61 | 1.3 |
| miR-4787-5p  | 13.0 ± 0.6 | 12.7 ± 0.4 | 0.61 | 1.2 |
| miR-6887-5p  | 6.9 ± 1.0  | 7.3 ± 0.8  | 0.61 | 1.4 |
| miR-8089     | 6.6 ± 0.7  | 6.9 ± 0.7  | 0.61 | 1.2 |
| miR-1343-5p  | 9.7 ± 0.3  | 9.5 ± 0.6  | 0.61 | 1.1 |
| miR-4257     | 6.9 ± 0.7  | 7.3 ± 0.6  | 0.61 | 1.3 |
| miR-4665-3p  | 6.2 ± 0.9  | 5.9 ± 0.7  | 0.61 | 1.2 |
| miR-4787-3p  | 6.4 ± 1.1  | 6.2 ± 0.7  | 0.61 | 1.1 |
| miR-6131     | 9.7 ± 2.8  | 11.2 ± 1.8 | 0.61 | 2.7 |
| miR-6515-5p  | 5.9 ± 1.1  | 6.3 ± 1.0  | 0.61 | 1.4 |
| miR-7641     | 6.1 ± 1.3  | 6.7 ± 1.0  | 0.61 | 1.5 |
| miR-7847-3p  | 7.1 ± 0.9  | 7.5 ± 0.7  | 0.61 | 1.3 |
| miR-92a-2-5p | 7.4 ± 0.8  | 7.1 ± 0.7  | 0.61 | 1.2 |
| miR-1292-3p  | 6.2 ± 0.9  | 5.7 ± 0.9  | 0.60 | 1.4 |

|              |            |            |      |     |
|--------------|------------|------------|------|-----|
| miR-3652     | 6.3 ± 0.9  | 6.6 ± 0.7  | 0.60 | 1.2 |
| miR-3665     | 13.4 ± 0.6 | 13.2 ± 0.5 | 0.60 | 1.1 |
| miR-4281     | 11.4 ± 0.6 | 11.3 ± 0.5 | 0.60 | 1.1 |
| miR-4433b-3p | 8.0 ± 0.4  | 8.2 ± 0.4  | 0.60 | 1.1 |
| miR-4728-5p  | 7.8 ± 0.6  | 8.0 ± 0.4  | 0.60 | 1.1 |
| miR-4736     | 6.8 ± 1.0  | 6.5 ± 0.9  | 0.60 | 1.3 |
| miR-4745-5p  | 12.5 ± 0.7 | 12.2 ± 0.7 | 0.60 | 1.2 |
| miR-658      | 6.8 ± 0.7  | 6.4 ± 0.7  | 0.60 | 1.3 |
| miR-6775-5p  | 9.1 ± 0.4  | 9.3 ± 0.7  | 0.60 | 1.1 |
| miR-6805-5p  | 10.6 ± 0.5 | 10.4 ± 0.4 | 0.60 | 1.2 |
| miR-7113-3p  | 6.3 ± 0.7  | 5.9 ± 0.7  | 0.60 | 1.3 |

<sup>a</sup> robust discrimination accuracy calculated by leave-one-out cross-validation.

**Supplementary Table 5: Odds ratios for discriminating sarcoma**

|                                   | Training set        |                                | Validation set      |                                |
|-----------------------------------|---------------------|--------------------------------|---------------------|--------------------------------|
|                                   | Univariate analysis | Age- and sex-adjusted analysis | Univariate analysis | Age- and sex-adjusted analysis |
| <b><i>vs. benign tumors</i></b>   |                     |                                |                     |                                |
| Index VI (positive vs. negative)  | 152 (53–437)        | 159 (54–470)                   | 22 (11–42)          | 23 (12–45)                     |
| miR-4736 (per 2-fold increase)    | 6.7 (4.1–11.1)      | 6.6 (4.0–10.9)                 | 2.9 (2.1–4.0)       | 2.9 (2.1–4.0)                  |
| miR-6836-3p (per 2-fold increase) | 7.4 (4.3–12.7)      | 9.6 (5.2–17.8)                 | 3.0 (2.2–4.2)       | 3.1 (2.2–4.3)                  |
| miR-4281 (per 2-fold increase)    | 1.4 (0.9–2.2)       | 1.7 (1.0–2.8)                  | 1.7 (1.0–2.8)       | 1.6 (1.0–2.7)                  |
| miR-762 (per 2-fold increase)     | 5.6 (3.0–10.5)      | 8.1 (4.1–16.1)                 | 5.4 (3.0–9.4)       | 5.4 (3.0–9.6)                  |
| miR-658 (per 2-fold increase)     | 3.4 (2.2–5.4)       | 3.3 (2.1–5.3)                  | 2.4 (1.7–3.5)       | 2.4 (1.6–3.5)                  |
| miR-4649-5p (per 2-fold increase) | 1.1 (0.8–1.5)       | 1.1 (0.8–1.5)                  | 1.2 (0.9–1.7)       | 1.2 (0.9–1.7)                  |
| miR-4665-3p (per 2-fold increase) | 3.1 (2.0–5.0)       | 3.41 (2.1–5.5)                 | 2.2 (1.4–3.3)       | 2.3 (1.5–3.4)                  |
| <b><i>vs. healthy</i></b>         |                     |                                |                     |                                |
| Index VI (positive vs. negative)  | N.A.                | N.A.                           | 109 (44–267)        | 111 (44–281)                   |
| miR-4736 (per 2-fold increase)    | 350 (41–2978)       | 458 (41–5118)                  | 7.7 (4.9–12.1)      | 7.6 (4.8–12.1)                 |
| miR-6836-3p (per 2-fold increase) | 47 (16–138)         | 139 (36–537)                   | 5.6 (3.5–8.9)       | 5.9 (3.7–9.4)                  |
| miR-4281 (per 2-fold increase)    | 47 (18–126)         | 60 (21–169)                    | 14 (6.7–31)         | 14 (6.2–30)                    |
| miR-762 (per 2-fold increase)     | 33 (13–87)          | 44 (16–124)                    | 13 (6.0–29)         | 12 (5.3–29)                    |
| miR-658 (per 2-fold increase)     | 266 (51–1379)       | 319 (53–1913)                  | 16 (8.2–30)         | 16 (8.3–31)                    |
| miR-4649-5p (per 2-fold increase) | 109 (29–412)        | 112 (29–427)                   | 9.2 (5.6–15)        | 9.1 (5.4–15)                   |
| miR-4665-3p (per 2-fold increase) | 162 (43–607)        | 481 (94–2463)                  | 22 (11–46)          | 23 (11–47)                     |

Data are expressed as the odds ratio (95% confidence interval).

N.A., not applicable because no samples were misdiagnosed.

**Supplementary Table 6: Information on the miScript PCR primers (QIAGEN)**

| Gene name        | Catalog No. | Assay type         | Mature miRNA sequence      |
|------------------|-------------|--------------------|----------------------------|
| hsa-miR-7113-3p  | MS00048300  | mature miRNA assay | CCTCCCTGCCCCGCCTCTCTGCAG   |
| hsa-miR-4281     | MS00021336  | mature miRNA assay | GGGTCCCAGGGAGGGGGG         |
| hsa-miR-4442     | MS00041279  | mature miRNA assay | GCCGACAAGAGGGAGG           |
| hsa-miR-663b     | MS00021791  | mature miRNA assay | GGTGGCCCGCCGTGCCTGAGG      |
| hsa-miR-4649-5p  | MS00040495  | mature miRNA assay | TGGGCGAGGGGTGGGCTCTCAGAG   |
| hsa-miR-6885-5p  | MS00048125  | mature miRNA assay | AGGGGGGCACTGCGCAAGCAAAGCC  |
| hsa-miR-762      | MS00021805  | mature miRNA assay | GGGGCTGGGGCCGGGGCCGAGC     |
| hsa-miR-4516     | MS00037555  | mature miRNA assay | GGGAGAAGGGTCGGGGC          |
| hsa-miR-4449     | MS00041216  | mature miRNA assay | CGTCCCAGGGGCTGCGCGAGGCA    |
| hsa-miR-6789-5p  | MS00046970  | mature miRNA assay | GTAGGGGCGTCCCAGGCGCGCGGG   |
| hsa-miR-4634     | MS00043771  | mature miRNA assay | CGGCGCGACCGCCCCGGGG        |
| hsa-miR-6836-3p  | MS00047544  | mature miRNA assay | ATGCCTCCCCCGGCCCCGCAG      |
| hsa-miR-4258     | MS00021175  | mature miRNA assay | CCCCGCCACCGCCTTGG          |
| hsa-miR-4787-3p  | MS00081479  | mature miRNA assay | GATGCGCCGCCACTGCCCCGCGC    |
| hsa-miR-1470     | MS00020342  | mature miRNA assay | GCCCTCCGCCCGTGCACCCCG      |
| hsa-miR-3195     | MS00044975  | mature miRNA assay | CGCGCCGGGCCCGGGTT          |
| hsa-miR-718      | MS00037856  | mature miRNA assay | CTCCGCCCCGCCGGGCGTGC       |
| hsa-miR-4665-3p  | MS00040313  | mature miRNA assay | CTCGGCCCGGGCGCGTAGCCCCCGCC |
| hsa-miR-619-5p   | MS00046032  | mature miRNA assay | GCTGGGATTACAGGCATGAGCC     |
| hsa-miR-1273g-3p | MSC0076466  | mature miRNA assay | ACCACTGCACTCCAGCCTGAG      |
| hsa-miR-665      | MS00010493  | mature miRNA assay | ACCAGGAGGCTGAGCCCCCT       |
| hsa-miR-4745-5p  | MS00045059  | mature miRNA assay | TGAGTGGGGCTCCCGGGACGGCG    |
| hsa-miR-658      | MS00005369  | mature miRNA assay | GGCGGAGGGAAGTAGGTCCGTTGGT  |
| hsa-miR-4736     | MS00039606  | mature miRNA assay | AGGCAGGTTATCTGGGCTG        |
| hsa-miR-4697-5p  | MS00040012  | mature miRNA assay | AGGGGGCGCAGTCACTGACGTG     |
| hsa-miR-4727-3p  | MS00039690  | mature miRNA assay | ATAGTGGGAAGCTGGCAGATTC     |
| hsa-miR-8059     | MS00048685  | mature miRNA assay | GGGGAAGTGTAGATGAAAAGGC     |
| hsa-miR-6087     | MS00045402  | mature miRNA assay | TGAGGCGGGGGGGCGAGC         |
| hsa-miR-149-3p   | MS00037702  | mature miRNA assay | AGGGAGGGACGGGGGCTGTGC      |
| hsa-miR-2861     | MS00042140  | mature miRNA assay | GGGGCCTGGCGGTGGGCGG        |
| hsa-miR-4463     | MS00044996  | mature miRNA assay | GAGACTGGGGTGGGGCC          |



## Supplementary Methods

### RNA extraction from fresh-frozen samples and quality controls

Fresh-frozen tissues were crushed to powder using a Multi-beads Shocker (Yasui Kikai, Osaka, Japan) under cooling with liquid nitrogen. Total RNA was extracted from frozen tumor tissue powder using the miRNeasy Mini Kit (Qiagen, Hilden, Germany). The quality of total RNA was assessed on a 2100 Bioanalyzer (Agilent Technologies, Santa Clara, CA, USA).

### MiRNA expression analysis of fresh-frozen samples

Comprehensive miRNA expression analysis was performed on 250 ng of total RNAs from fresh-frozen samples using the 3D-Gene<sup>®</sup> miRNA Labeling kit and the 3D-Gene<sup>®</sup> Human miRNA Oligo Chip (Toray Industries, Inc., Tokyo, Japan), which was designed to detect 2565 miRNA sequences registered in miRBase release 21 (<http://www.mirbase.org/>). For quality control of microarray data, a coefficient of variation for negative control probes >0.15 or more than 10 flagged probes was considered evidence of low-quality results, and samples meeting either criterion were excluded from further analyses. A miRNA was considered to be present if the corresponding signal was greater than the mean + 2 × standard deviations of the negative control signal (from which the top and bottom 5%, ranked by signal intensity, had been removed). Once a miRNA was considered present, the mean signal of the negative controls (from which the top and bottom 5%, ranked by signal intensity, had been removed) was subtracted from the miRNA signal. When the signal value was negative (or undetected) after background subtraction, the value was replaced by the lowest signal intensity on the microarray minus 0.1 on a base-2 logarithmic scale. A global median method was used to normalize signals among microarrays.

### Algorithm: combinatorial optimization for multi-candidate miRNAs

Notation:

N: number of candidate sets of miRNAs desired.

M: maximum combination number of miRNAs of each candidate set desired.

Score: Accuracy =  $(TP + TN) / (TP + FP + FN + TN)$ ; each abbreviation is defined below.

|                     | cancer                        | no cancer                     |
|---------------------|-------------------------------|-------------------------------|
| prediction positive | TP: number of true positives  | FP: number of false positives |
| prediction negative | FN: number of false negatives | TN: number of true negatives  |

Step 1: Set N and M.

Step 2: FOR EACH miRNA:

Evaluate the average score (Accuracy) for a selected miRNA by means of linear discriminant analysis with leave-one-out (LOO) cross-validation.

Step 3: Sort the result in descending order, and keep the top N miRNAs as a first candidate set for the next step.

Step 4: FOR  $i = 2$  TO  $M$ :

Step 4-1: FOR EACH of N candidates:

Make all combinations of the remaining miRNAs against the selected candidate (set) and obtain scores by means of linear discriminant analysis with LOO (same as step 2).

Step 4-2: Sort scores for all combinations [ $N \times (\text{total number of miRNAs} - i)$ ] and select the top N sets of combinations consist of  $i$  miRNAs in the next step.
